# Supplementary material for: Experimental and Theoretical Screening of Core Gold Nanoparticles and Their Binding Mechanism to an Anticancer Drug, 2-Thiouracil
Source: MDPI journal article supplement (doi:10.3390/molecules29010121), 2023-12-24
Supplement: s1 [file s1]

## Supplementary Information

*Experimental and theoretical screening of core gold nanoparticles and their binding mechanism to an anticancer drug, 2-thiouracil*

Génesis Lorenzana-Vázquez <sup>1</sup>, Daniel G. Adams <sup>2</sup>, Lauren G. Reyna<sup>2</sup>, Enrique Meléndez <sup>1,\*</sup>, and Ioana E. Pavel <sup>2,\*</sup>

Figure S1 displays the raw UV-Vis absorption data, which were collected on the core AuNP models before filtration.

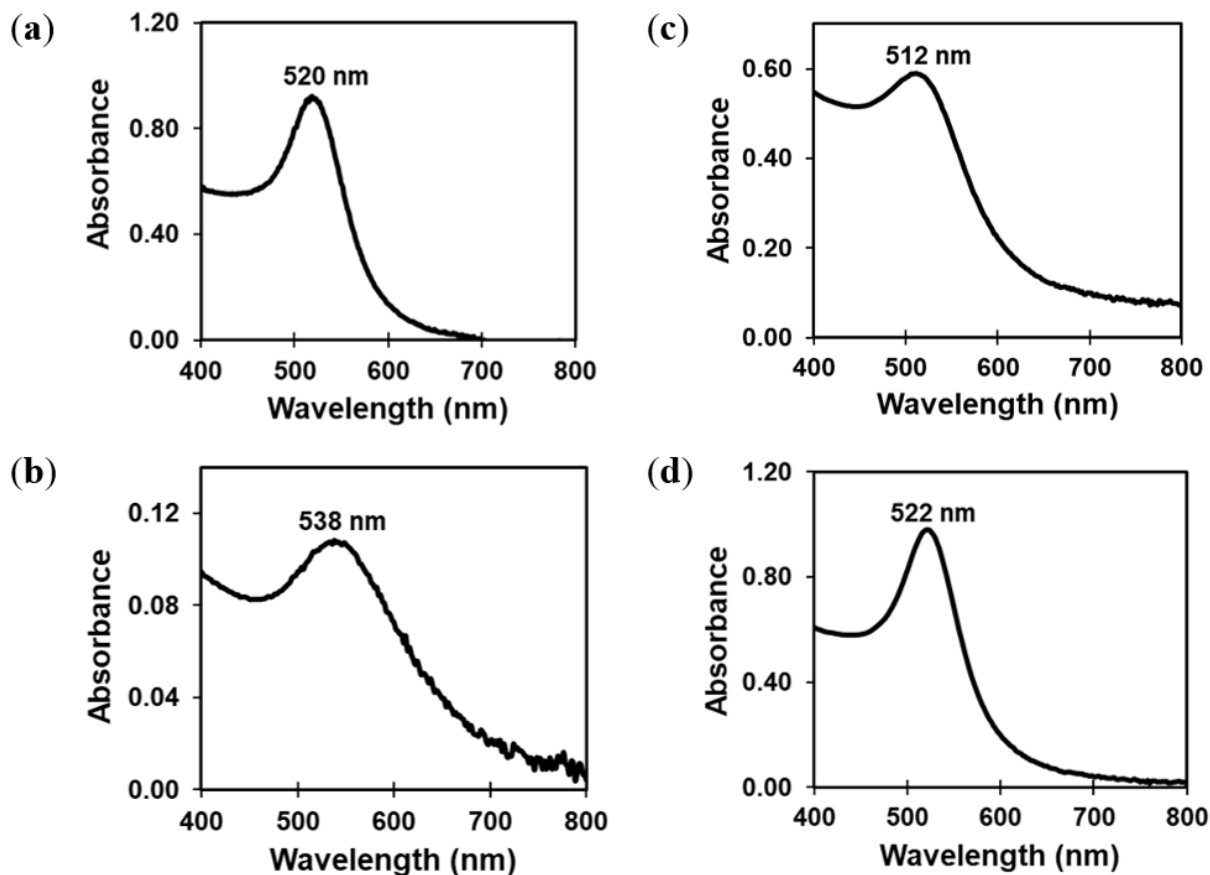

**Figure S1.** Original UV-Vis absorption spectra of (a) citrate-capped, (b) borohydride-citrate-capped, (c) sodium dodecyl sulfate (SDS)-capped AuNPs, and (d) citrate-capped AuNPs functionalized with 2-TU in the 400-800 nm spectral range.

Figure S2 displays the raw UV-Vis absorption data and the pictures of the vials containing colloidal aliquots, which were collected on the original, core AuNPs, before and after filtration.

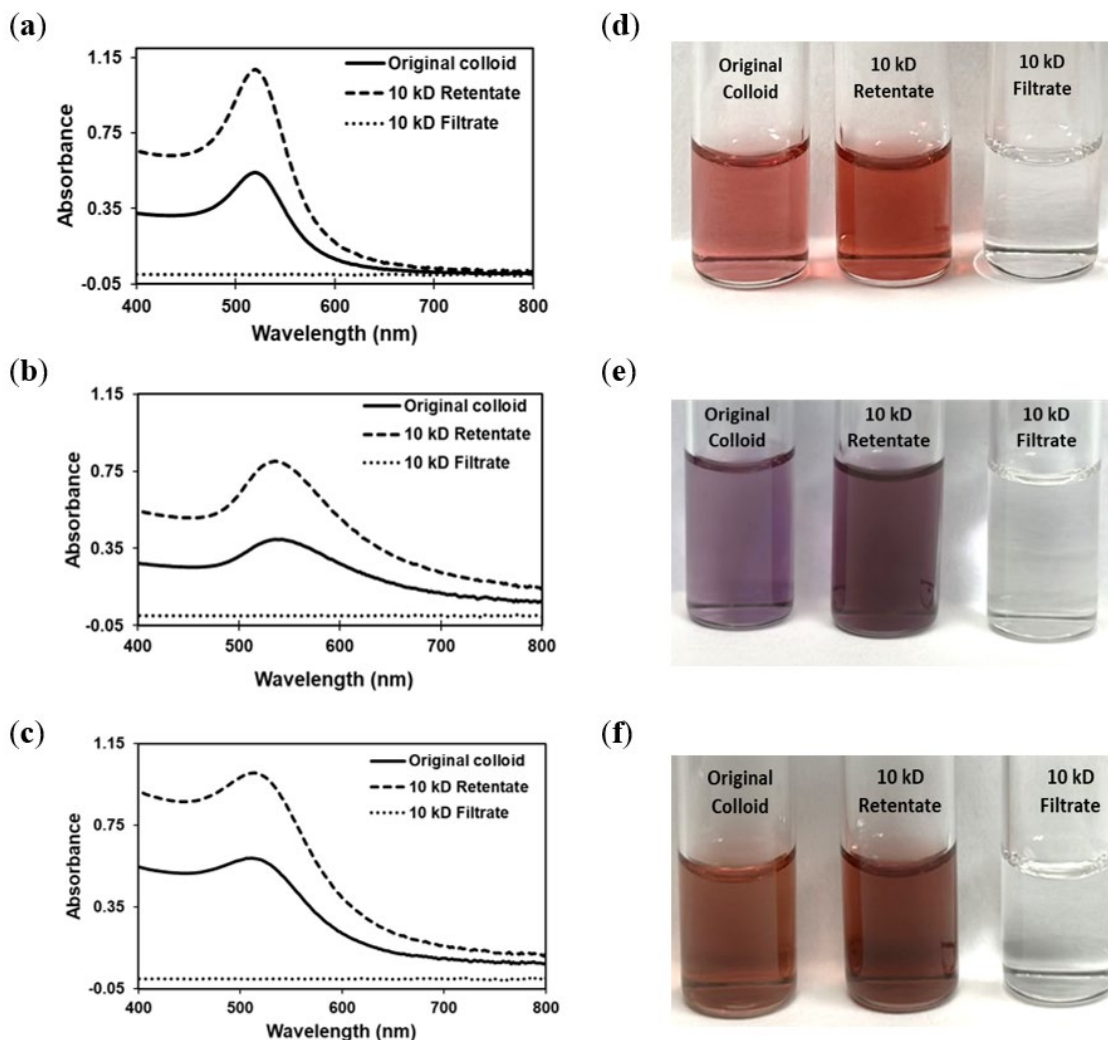

**Figure S2.** Physicochemical characterization of the colloidal AuNPs before and after the 10-kD filtration: (a, d) citrate-capped AuNPs, (b, e) borohydride-citrate-capped AuNPs, and (c, f) SDS-capped AuNPs. Panels (a-c) show the corresponding UV-Vis absorption spectra, while panels (d-f) represent images of the vials containing the original colloid, the 10-kD retentate containing concentrated AuNPs, and the 10-kD filtrate consisting mostly of water.

Figure S3 shows the labeled structures of 2-TU and 2-TU-Au complex configurations that were input into Orca for the theoretical simulations of the UV-Vis absorption spectra.

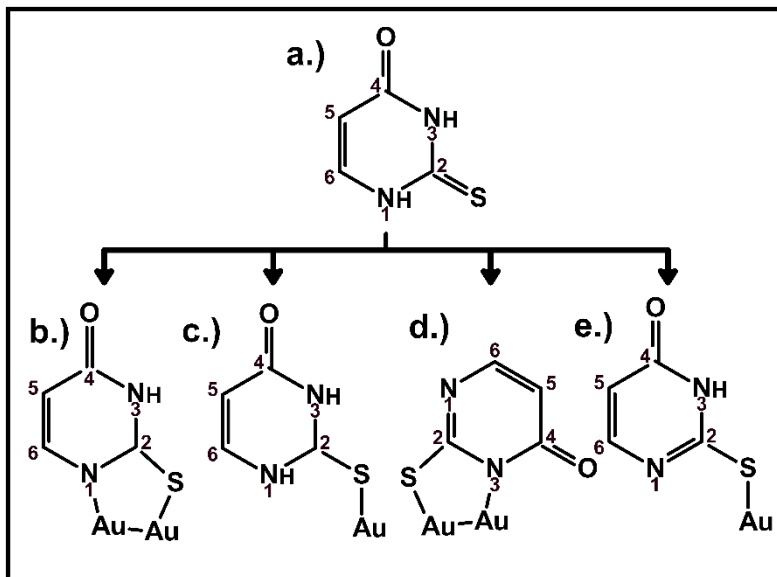

**Figure S3.** Labeled structures of (a) free 2-TU and (b-e) possible bonding configurations of the two tautomeric forms of 2-TU (pH = 6.7) complexed to Au atoms. The optimized structures (a) and (c) were utilized in the theoretical simulations of the UV-Vis absorption spectra.
